# Supplementary material
Source: publisher figshare collection journal article supplement (https://gsajournals.figshare.com/articles/dataset/_/14037824)
Supplement: Supplementary file 1 [file 1]

|                                                              |                                                                                                                                                                                                                                                                                                                                              |
|--------------------------------------------------------------|----------------------------------------------------------------------------------------------------------------------------------------------------------------------------------------------------------------------------------------------------------------------------------------------------------------------------------------------|
|                                                              | <b>Cμ1</b>                                                                                                                                                                                                                                                                                                                                   |
| >AFA53237_OmIgDSec<br>>aOm_Ch13_CH32_F                       | ASSTAPTLLFPLAQCGSGTGDMMTLGCIATGFTPASLTFKWNDEGGNSLTDVFQYPAVQTTGGSYMGVSQLRVKRADWDSKKFECAVEHSAGSKKVPVKKQ<br>ASSTAPTLLFPLAQCGSGTGDMMTLGCIATGFTPASLTFKWNDEGGNSLTDVFQYPAVQTTGGSYMGVSQLRVKRADWDSKKFECAVEHSAGSKKVPVKKQ                                                                                                                               |
|                                                              | <b>Cδ1</b>                                                                                                                                                                                                                                                                                                                                   |
| >AFA53237_OmIgDSec<br>>aOm_Ch13_CH36_F                       | LQRVIPPNITLYPLWEELEVGSKVGILCILSGFYDPKLSVEWLLDDETVTTSPPVQQKLQSVEGEEKTFSLNSQLELDQSQWTTQGSEVTCATHNAAQGPPTGTPVSRTTSICS<br>LQRVIPPNITLYPLWEELEVGSKVGILCILSGFYDPKLSVEWLLDDKTVTTSPPVQQKLQSVEGEDKIFSLNSQLELDQSQWTTQGSEVTCATHNAAQGPPTGTPVSRTTSICS                                                                                                     |
|                                                              | <b>Cδ2</b>                                                                                                                                                                                                                                                                                                                                   |
| >AFA53237_OmIgDSec<br>>aOm_Ch13_CH37_F<br>>aOm_Ch13_CH43_F   | AFPSSTPSIHLETPrFRFTVMTQTQTEVTATCVVHSAYDARVSWLLDGKDPTSRTPVNQASRTTQSISSNLTLPSQWKTlNTITCRAEHRCFNSTEKTSNVK<br>AFPSSTPSIHLETPrFRFTVMTQTQTEVTATCVVHSAYDAKVtWLLDGKDPTSRtKVnQASStTQSISSNLTLPSQWKTlNTITCRAEHRCFNSTEKTSNVK<br>AFPSSTPSlHLETPrFRFTVMTQTkVTATCVVHSAYDAKVSWLLDGKDPTSRtPVnQASStTQSISSNLTLPSQWKTlNTITCRAEHRCFNSTEKTRNVK                     |
|                                                              | <b>Cδ3</b>                                                                                                                                                                                                                                                                                                                                   |
| >AFA53237_OmIgDSec<br>>aOm_Ch13_CH38_ORF<br>>aOm_Ch13_CH41_F | GPAVSSTTTVLIRRSLPeLLKGDSaVLECAITQLSSSDLYVTFQANGVDFPEKQYVDLPASNGPHSLTKRFSIPKSHWKTdNTFTCKVNQGYSNSWVSSSKIKLF<br>GPAVSSTTTVLIRRSLPeLLKGDSaVLECAITQLSSSDLYVTFQANGVDFPEKQYVDLPASNGPHSLTKRFSIPKSHWKTdNTFTCKVNQGYSNSWVSSSKIKLF<br>GPAVSSTTTVLIRRSLPeLLKGDSaVLECAITQLSSSDLYVTFQANGVDFPEKQYVDLPASNGPHSLTKRFSIPKSHWKTdNTFTCKVNQGYSNSWVSSSKIKLF          |
|                                                              | <b>Cδ4</b>                                                                                                                                                                                                                                                                                                                                   |
| >AFA53237_OmIgDSec<br>>aOm_Ch13_CH39_F<br>>aOm_Ch13_CH42_F   | GELSMELLlVPSEESSGSGTQKLmCSGwGfNPKIKWlSGSEQKSAADNEIRMGEDGHVALTSHITVTtQQEWNEGKDFICEVDDKDLQKtVRKSTSLCT<br>GELSMELLlVPSEESSGSGTQKLmCSGwGfNPKIKWlSGSEQKSAADNEIRMGEDGHVALTSHITVTtQQEWNEGKDFICEVDDKDLQKtVRKSTSLCT<br>GELSMELLlVPSEESSGSGTQKLmCSGwGfNPKIKWlSGSEQKSAADNEIRMGEDGHVALTSHITVTtQQEWNEGKDFICEVDDKDLQKtVRKSTSLCT                            |
|                                                              | <b>Cδ2</b>                                                                                                                                                                                                                                                                                                                                   |
| >AFA53237_OmIgDSec<br>>aOm_Ch13_CH40_F                       | AFPSSTPSlHLETPrFRFTVMTQTQTEVTATCVVHSAYDAKVSWLLDGKDPTSRTPVNQASSTTQSVSSNLTLPSQWKTlNTITCRAEHRCFNSTEKTRNVK<br>AFPSSTPSlHLETPrFRFTVMTQTQTEVTATCVVHSAYDAKVSWLLDGKDPTSRtPVnQASStTQSISSNLTLPSQWKTlNTITCRAEHRCFNSTEKTRNVK                                                                                                                             |
|                                                              | <b>Cδ7</b>                                                                                                                                                                                                                                                                                                                                   |
| >AFA53237_OmIgDSec<br>>aOm_Ch13_CH44_F<br>>aOm_Ch13_CH45_ORF | GSVTPSAPTATLLQGpSELVRLVlGFSPSDINITWLLDNVtELWNNNTSTPyRAPGgKfGIRSHLSLAHQDLTPGAVYTCRVTHtTQTlALNISKPGVCLSVHSILi-<br>GSVTPSAPTATLLQGpSELVCLVlGFSPSDINITWLLDNVtELWNNNTSTPyRAPGgKfGIRSHLSLAHQDLTPGAVYTCRVTHtTQTlALNISKPGVCLSVHSILi-<br>GSVTPSAPTATLLQGpSELICLVlGFSPSDINITWLLDNVtELWNNNTSTPyRAPGGMfGIRSHLSLAHQDLTPGAVYTCRVTHtTQTlALNISKPGVCLPVHSILiQ |
