# Supplementary material
Source: publisher figshare collection journal article supplement (https://gsajournals.figshare.com/articles/dataset/_/14037824)
Supplement: Supplementary file 2 [file 1]

A)

Figure S5

| Ct1            |                                                                                                                          |
|----------------|--------------------------------------------------------------------------------------------------------------------------|
|                | <b>ATAPPTLLTLMNCGTPSNDIYSIGC-A-GFSPSSLTfKwTDASgKALtdFvQYpAVQSG--Y-GVSQ-RVAKNVWENSKSFSCSVEH-G---TAVINKP</b>               |
| aOm_Ch13_IGHT3 | ATAPSTLLTLMNCGTPSNDIYSLGCIAGFSPSSHTfQwTDASgKALtdFvQYpAVQSGETyTgVSQlRVAKNVWENSKSFRCsVDHPGGAKTAVINKP                       |
| aOm_Ch12_IGHT3 | ATAPPTLLTLMNCGTPSNDIYSIGCLATGFSPSSLTfKwTDASgKALtdFvQYpAVQSGGAYIGVSQVRVAKNVWENSKSFSCSVEHLGSDQTAVINKP                      |
| aOm_Ch12_IGHT2 | ATAPPTLLILMNCGTPSNDIYSIGCVAKGFSPSSLTfKwTDDSGsALTdFvQYpAVQSGETyTgVSQlSVKKNVWGKSTSFSCSVEHAGVIKTAVINKP                      |
| aOm_Ch12_IGHT1 | ATAPPTLLTLMNCGTPSNDIYSIGCLATGFSPSSLTfKwTDASgKALtdFvQYpAVQSGGAYIGVSQVRVAKNVWENSKSFSCSVEHLGSDQTAVINKP                      |
| Ct2            |                                                                                                                          |
|                | <b>V-KSPSVSLLS-PIGTTQYLMCMIEDFTPNKVTvTWKKNDKEVEGQTPTVGLQPSGLYSASSLLKVN-T-WNNKV-YSCVV-HQG-PTIKTISKTE</b>                  |
| aOm_Ch13_IGHT3 | VPKSPTVSLLSAPIGTTQYLMCMIEDFTSETVKVTWKKNDMEVEGQTPTLGKRPSGLYSGSSLLKVTNTDWNKVKYSCVVEHQGETISKTTSKTE                          |
| aOm_Ch12_IGHT3 | VSKSPSVSLLSGPIGTTQYLMCMIEDFTPNKVTvTWKKNDKEVEGQTPTVGLQPSGLYSASSLLKVNKTEWNNKVNYSQVQHQGKPTIKTISKTE                          |
| aOm_Ch12_IGHT2 | VPKLPVSLLSAPIGTTQYLMCMIEDFAPNKVTvIWKNNNDKEVGKPTPTVGLQPSGLYSASSLLKVNNTDWRNKVKYSCVVEHQGQPTIKTISKTE                         |
| aOm_Ch12_IGHT1 | VSKSPSVSLLSGPIGTTQYLMCMIEDFTPNKVTvTWKKNDKEVEGQTPTVGLQPSGLYSASSLLKVNKTEWNNKVNYSQVQHQGKPTIKTISKTE                          |
| Ct3            |                                                                                                                          |
|                | <b>PLTVTLNPPSVKNVFMDNQAVLDCVI-GTDQNTVAGTTITW-VNG-----I-----ESKGNLNSRVSTLTIDQTRWTVNVKvQCSAMKSGEDTPVIQD-SFTKGS</b>         |
| aOm_Ch13_IGHT3 | PLTVTLNPPRVREVFLDNQAVLECVITATDQNTVSGTNITWHINGDIQTaHIDLKPIESKGNLNSRVSTLTIDQTRWTVNVKvQCSAMKSGEDTPVIQDISFTKGS               |
| aOm_Ch12_IGHT3 | PLTVTLNPPSVKNVFMDNQAVLDCVISGTDQNTVAGTTITWQVNGNEMKNI----VESKGNLNSRVSTLTIDQTRWTVNVKvQCSAMKSGEDTPVIQDLSFTKGS                |
| aOm_Ch12_IGHT2 | PLTVTLNPPSVKNVFMDNQAVLDCVICGTEQNTVAGTTITWHVNRQKQTDHIDLKPIESKGNLNSRVSTLTIDQTRWTVNVKvQCSAMKSGEDTPVIQDISFTKGS               |
| aOm_Ch12_IGHT1 | PLTVTLNPPSVKNVFMDNQAVLDCVISGTDQNTVAGTTITWQVNGNEMKNI----VESKGNLNSRVSTLTIDQTRWTVNVKvQCSAMKSGEDTPVIQDLSFTKGS                |
| Ct4            |                                                                                                                          |
|                | <b>-APSVSVHLLPEEDTKKEGDVTLVCLVVPSPSLCDVYIMWKEDSSEYQDGVTSPPQKT-EGNYSVTSVFTVKTnKWEG-SVFTCAVKH-GLDNNTAP-E-SVSKS-GNSCEDK</b> |
| aOm_Ch13_IGHT3 | EAPSVSVHILPEEDTKKGDVTLVCLVVPSPSLCDVYIMWKEDSSEYQEGVTSPPQKTtKKGNyFVTSVFTTTtKDKWDTNVLFtCAVKHAGSDNSTSPKEMSVSKSTGNSCEDK       |
| aOm_Ch12_IGHT3 | RAPSVSVHLLPEEDTKKEGDVTLVCLVVPSPSLCDVYIMWKEDSSEYQDGVTSPPQKTPEGNYSVTSVFTVKTnKWEGDSVFTCAVKH-GLDNNTAPQERSVSKSMGNSCEDK        |
| aOm_Ch12_IGHT2 | EAPSVSIHLLPEEDTKKEGDVTLVCLVVPSPSLCDVYIMWKEDSSEYQDGVTSPPQKTLEGNYSVTSVFTVKTnKWEGNSVFTCAIKH-SLDNNTALFFSFLFHLyLT----         |
| aOm_Ch12_IGHT1 | RAPSVSVHLLPEEDTKKEGDVTLVCLVVPSPSLCDVYIMWKEDSSEYQDGVTSPPQKTPEGNYSVTSVFTVKTnKWEGDSVFTCAVKH-GLDNNTAPQERSVSKSMGNSCEDK        |

B)

|                        | aOm_Ch13_IGHT3 | aOm_Ch12_IGHT1 | aOm_Ch12_IGHT2 | aOm_Ch12_IGHT3 |
|------------------------|----------------|----------------|----------------|----------------|
| <b>AAW66978.1_IgT1</b> | <b>99.3</b>    | <b>78.7</b>    | <b>77.5</b>    | <b>78.7</b>    |
| <b>AAV48553.1_IgT2</b> | <b>78.9</b>    | <b>99.8</b>    | <b>83.8</b>    | <b>99.8</b>    |
| <b>ANW11927.1_IgT3</b> | <b>82.8</b>    | <b>80.6</b>    | <b>77.5</b>    | <b>80.6</b>    |
| <b>aOm_Ch13_IGHT3</b>  |                | <b>79.2</b>    | <b>77.9</b>    | <b>79.2</b>    |
| <b>aOm_Ch12_IGHT2</b>  |                |                | <b>83.8</b>    | <b>100</b>     |
| <b>aOm_Ch13_IGHT3</b>  |                |                |                | <b>83.8</b>    |
