# Supplementary material
Source: publisher figshare collection journal article supplement (https://gsajournals.figshare.com/articles/dataset/_/14037824)

Supplementary File 3:  
Graphic presentation  
of the Hi-C contact  
map scaffolds  
generated by the  
program Juicebox and  
showing 32 major  
scaffolds.

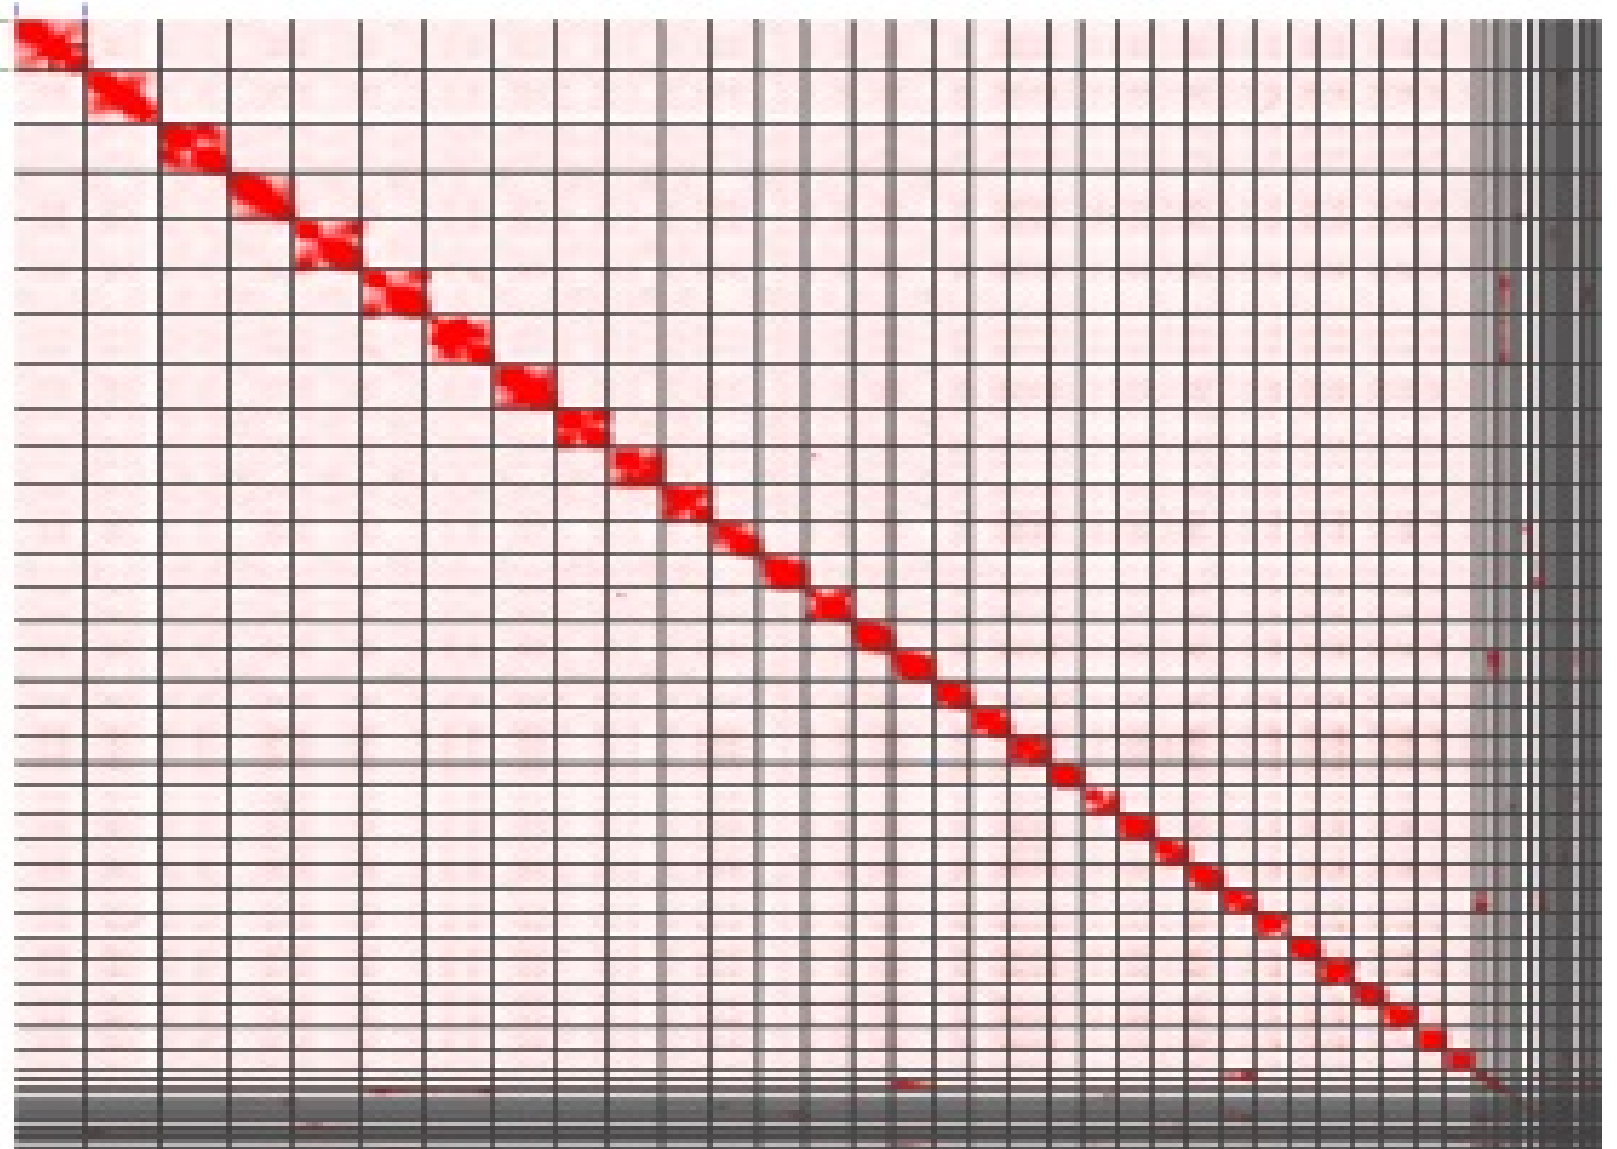

Supplement: Supplementary file 7 [file 1]
