# Supplementary material
Source: publisher figshare collection journal article supplement (https://gsajournals.figshare.com/articles/dataset/_/14037824)

## IGHD in locus IGHA

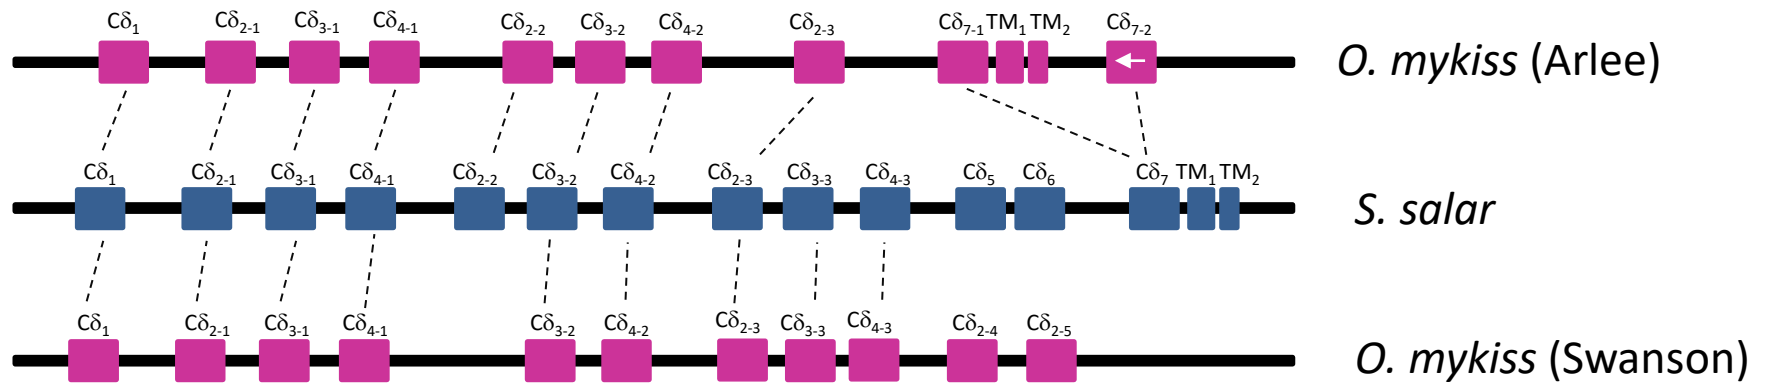

## IGHD1 and IGH D2 genes (Arlee)

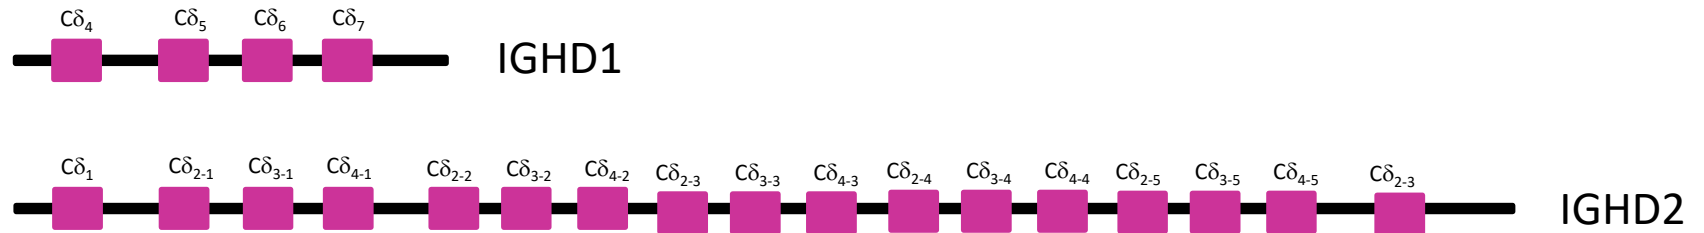

Supplement: Supplementary file 4 [file 1]

Figure S4

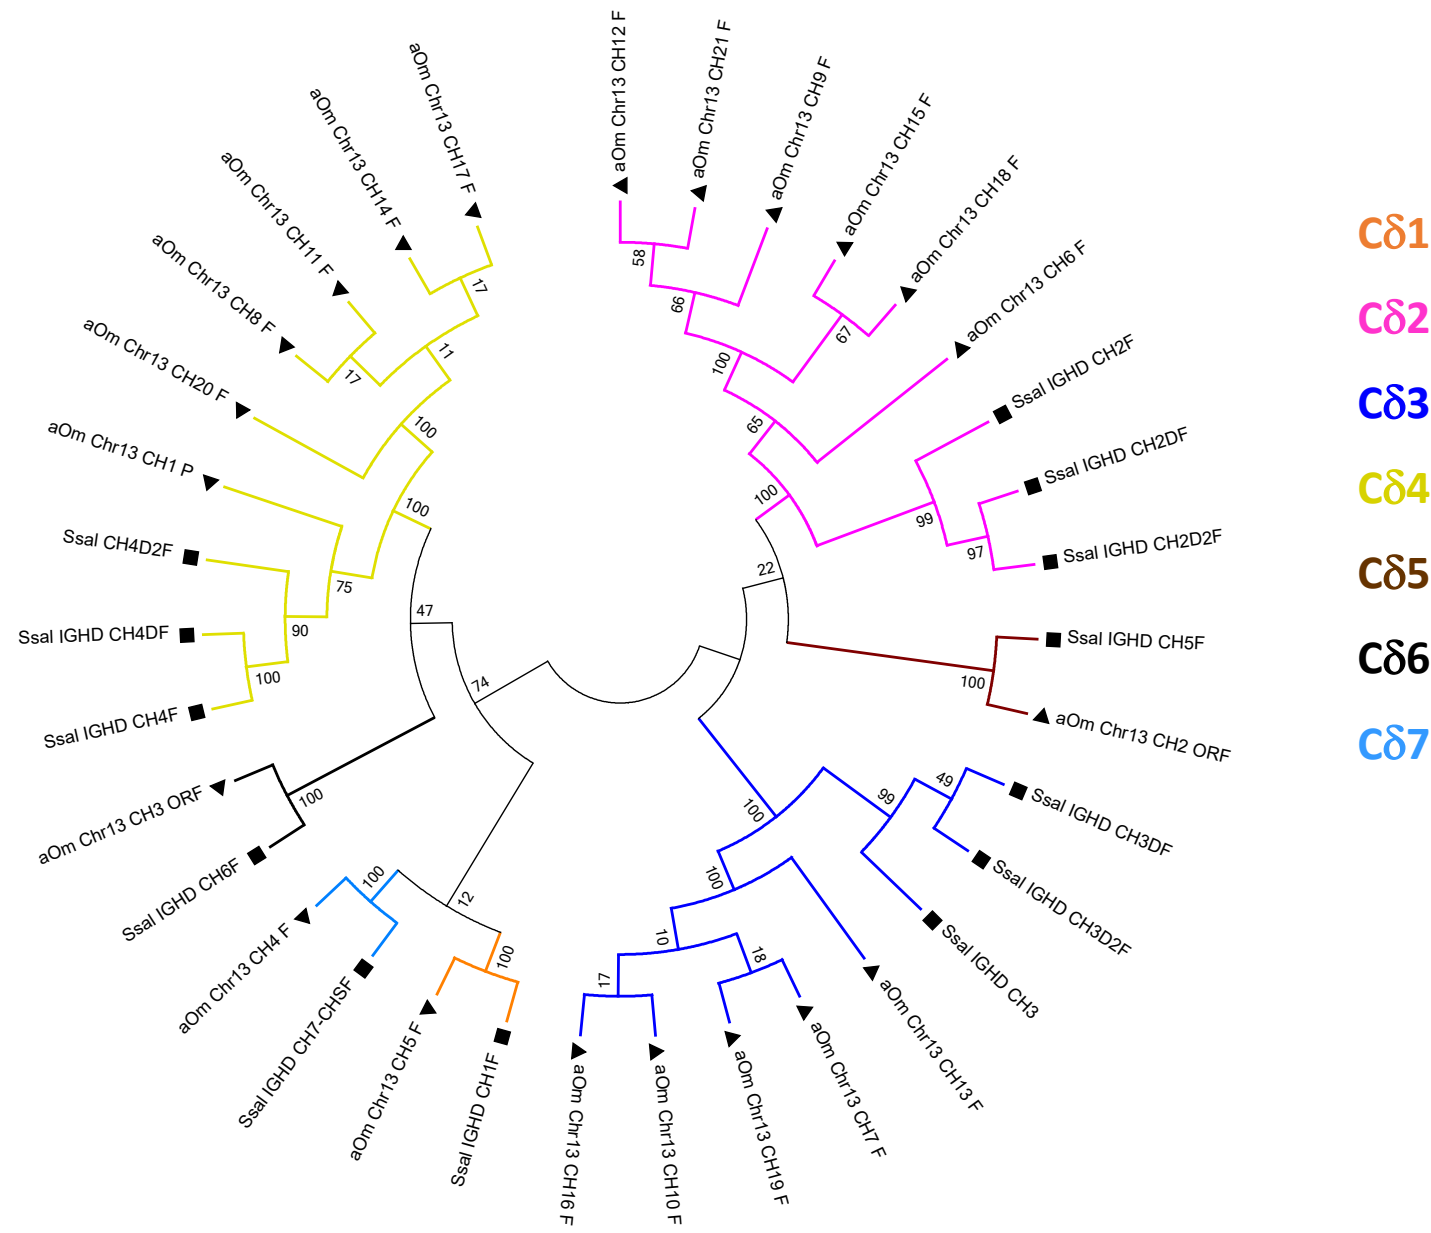

Supplement: Supplementary file 5 [file 1]

*Figure S2*

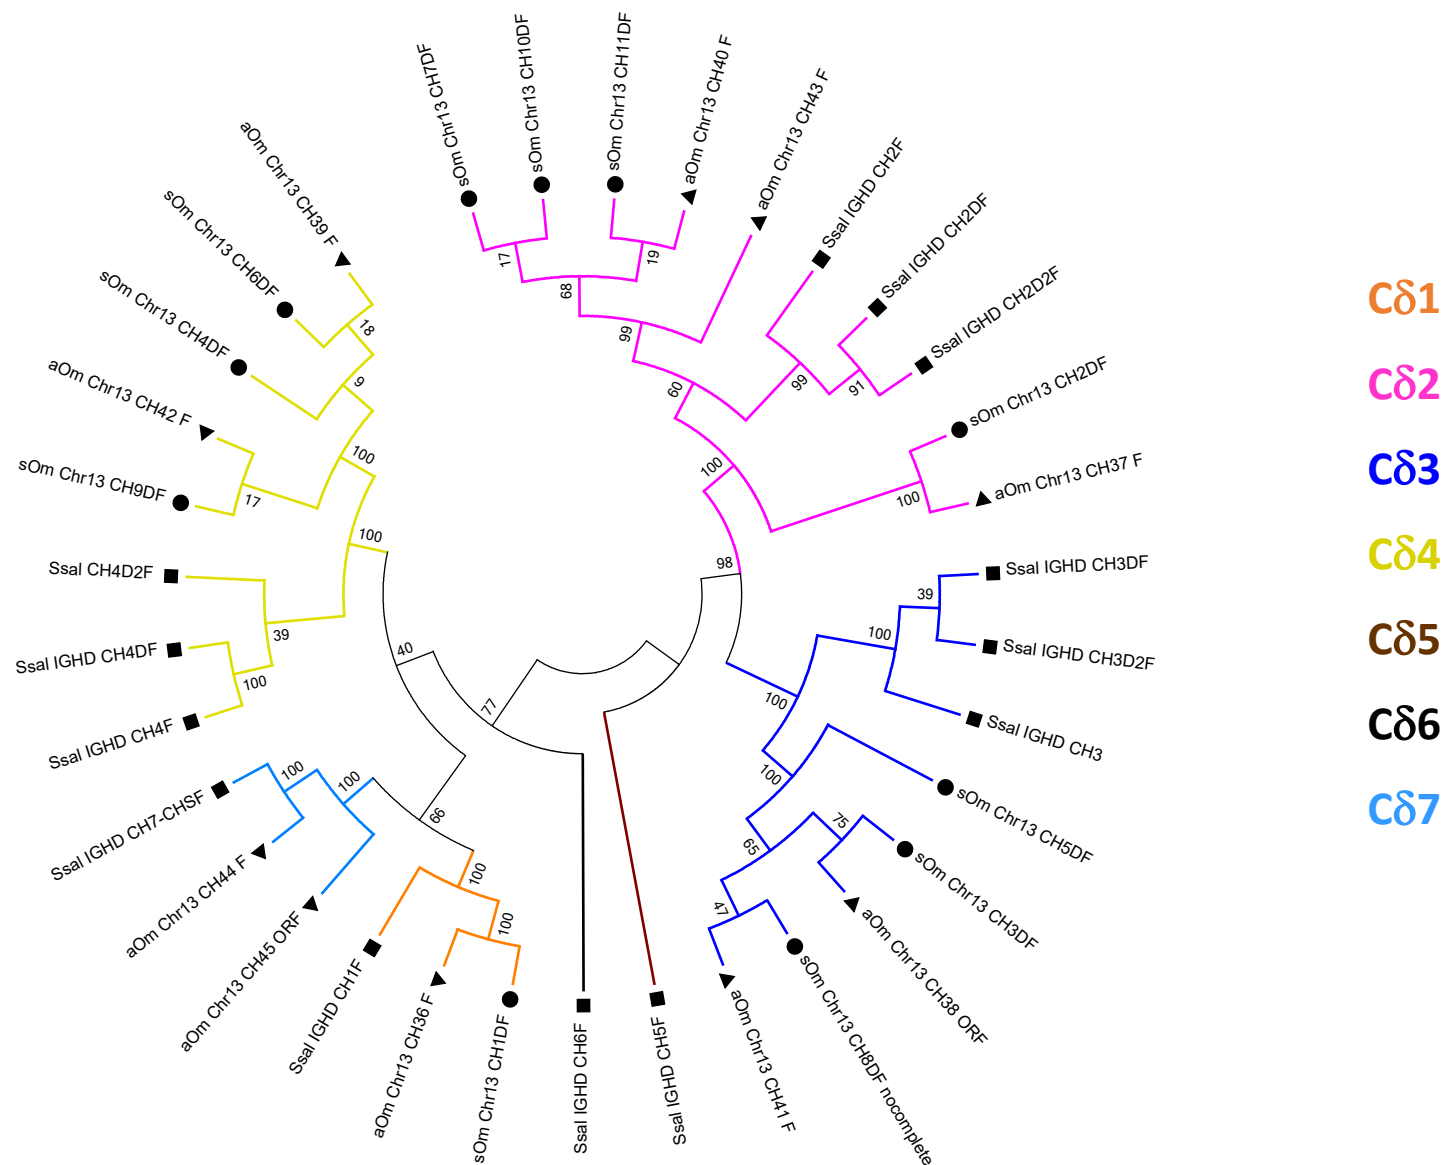

Supplement: Supplementary file 6 [file 1]
